## OBITUARY

# Obituary: Walter J. Gehring (1939-2014)

Alexander F. Schier\*

---

Alex Schier looks back at the life and research of his graduate mentor and friend Walter Gehring.

---

Walter Gehring, one of the fathers of modern developmental biology, died on May 29th 2014 from the injuries sustained in a car accident. Gehring and his collaborators led the field, from experimental embryology to molecular genetics. On the way they discovered the homeobox, isolated master regulators of segment identity and organ formation, developed enhancer trapping and helped reveal the remarkable conservation of developmental control mechanisms in animals.

Gehring grew up in Switzerland and was trained as a classical zoologist, gaining his first research experience with radar studies of bird migration. As a graduate student with Ernst Hadorn, he studied transdetermination, the process by which, upon repeated transplantation, imaginal discs can change their identity from one segment to another (Gehring, 1966b). During that time, Gehring also found a gain-of-function allele of *Antennapedia*, which transformed the antennae of a fruit fly into legs (Gehring, 1966a). The realization that tissues can be transformed from one fate into another through transplantation or mutation defined Gehring's future path and his quest to identify the molecular basis of tissue identity.

Gehring joined Yale University in 1965, first as a postdoctoral fellow in Alan Garen's laboratory and then as an assistant and associate professor. He attempted to purify DNA-binding proteins that differed between imaginal discs but was initially unsuccessful in these efforts and retreated to more tractable projects (Chan and Gehring, 1971; Shearn et al., 1971). In 1972 he returned to Switzerland and became one of the founding members of the Biozentrum at the University of Basel. It was at the Biozentrum that he and his co-workers helped revolutionize the field of developmental biology over the next 25 years.

Gehring was one of the early disciples of the molecular cloning revolution. Following in the footsteps of his friend Dave Hogness (Bender et al., 1983; Glover et al., 1975), he and his team isolated some of the first *Drosophila* genes and then embarked on the cloning of *Antennapedia* (Artavanis-Tsakonas et al., 1977; Garber et al., 1983; also see Scott et al., 1983). This tour de force was rewarded with the monumental discovery of a DNA segment – the homeobox – that was conserved not only between *Antennapedia* and other *Drosophila* homeotic genes but also in other animals, including humans (McGinnis et al., 1984a,b,c; also see Scott and Weiner, 1984). Not unjustly, the homeobox has been called the Rosetta Stone of developmental biology: it was the blueprint for the isolation of developmental control genes in all animals and laid the molecular foundation for the field of evo-devo (Slack, 1984).

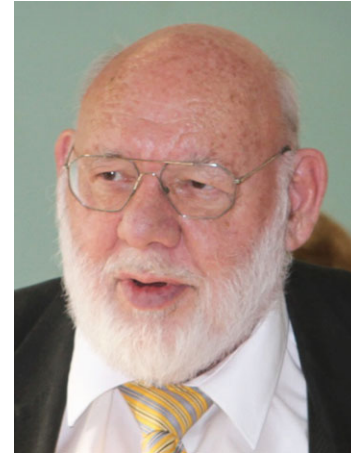

Image courtesy of Biozentrum Basel

In quick succession, Gehring and his collaborators identified scores of homeobox genes, revealed their expression patterns, dissected their regulatory regions, and determined how the homeodomain binds to DNA *in vitro* and *in vivo* (Fjose et al., 1985; Hafen et al., 1984; Hiromi and Gehring, 1987; Hiromi et al., 1985; Kuroiwa et al., 1984; Mlodzik et al., 1985; Qian et al., 1989; Schier and Gehring, 1992). Remarkably, when Gehring and his co-workers ectopically expressed *Antennapedia* in transgenic flies, they induced the same antenna-to-leg transformation that he had observed 20 years earlier as a student (Schneuwly et al., 1987). This experiment was not only the culmination of 20 years of research but it also provided the proof-of-principle that tissues can be reprogrammed and redesigned *in vivo*, a quest that is ongoing in the field of regenerative medicine.

During that time, Gehring and his group also pioneered *in situ* hybridization and developed enhancer trapping and thus revealed some of the most stunning patterns in biology, ranging from gradients and stripes to fine-grained arrangements in the nervous system (Bellen et al., 1989; Hafen et al., 1984, 1983; Levine et al., 1983; Mlodzik et al., 1985; O'Kane and Gehring, 1987; Wilson et al., 1989; also see Akam, 1983). These iconic images were only surpassed by the eyes on the legs of *Drosophila*, generated by the misexpression of *eyeless* (*Pax6*) (Halder et al., 1995). Discovered serendipitously, *eyeless* was found to be both necessary and sufficient for eye development, and supported the concept of organ selector genes (Halder et al., 1995; Quiring et al., 1994). Even more importantly, the broad conservation of *Pax6* in all animals and its expression in eye precursors overturned the idea that the eye had evolved independently dozens of times. Instead, Gehring postulated that the strikingly diverse eyes found in the animal kingdom derived from an ancestral eye (Gehring and Ikeo, 1999). Thus, the discoveries of the homeobox and *Pax6* were not only thrilling scientifically, but they also highlighted philosophical and even ethical implications about the shared heritage of all animals.

Most recently, Gehring took up the challenge set forth by his hero Charles Darwin – how could “*organs of extreme perfection and*

---

Department of Molecular and Cellular Biology, Harvard University, 16 Divinity Avenue, Cambridge, MA 02138, USA.

\*Author for correspondence (schier@fas.harvard.edu)

complication” evolve – and began to search “for the gradations through which an organ in any species has been perfected” (Darwin, 1859). Gehring postulated a symbiont theory for eye evolution, which he dubbed the ‘Russian Doll’ hypothesis (Gehring, 2014). He supported the idea that light sensitivity first arose in cyanobacteria, which were later engulfed by red algae as primary chloroplasts. In turn, the red algae were taken up by dinoflagellates as secondary chloroplasts and transformed into complex photoreceptive organelles. Finally, he imagined that through endosymbiotic gene transfer dinoflagellate genes were transferred to cnidarians. It now falls to the next generation of evolutionary developmental biologists to test Gehring’s Russian Doll hypothesis.

Today, we take many of the concepts and technologies developed by Gehring and his colleagues for granted. But these breakthroughs happened at a time when many developmental biologists were still following the credo of classical embryology and focused on cutting and pasting tissues between embryos. Indeed, *Development* only gained its current name in 1987; previously going by the title *Journal of Embryology and Experimental Morphology*. Gehring’s path reflected, predicted and guided this transformation in the field and this publication. Fittingly, he served as an editor for *Development* from 1990 to 1992 and on the editorial advisory board for many years, and published one of his first and one of his last papers in this journal (Gehring, 1966b; Prince et al., 2008).

Gehring received numerous awards, from the Kyoto Prize for Basic Science (2000) to the Grosses Bundesverdienstkreuz of Germany (2010). Like many great scientists, Gehring had his egocentricities (Gehring, 1998) and detractors (Gehring, 1999; McGinnis and Lawrence, 1999) but he had a magic touch in attracting highly motivated colleagues, who he enabled and encouraged to pursue risky, high-impact projects in an environment that functioned like an artist colony. A visitor to his laboratory in the late 1980s and early 1990s would have witnessed students transplanting imaginal discs, cloning developmental control genes or dissecting enhancers; postdocs studying the biochemistry of homeodomain-RNA and -DNA interactions, testing homologous recombination in flies or cloning enhancer-trapped genes; and technicians analyzing the heat shock response in desert ants. His influence on the community is reflected in the list of his former laboratory members, which includes Eric Wieschaus, Janni Nüsslein-Volhard, Paul Schedl, Spyros Artavanis-Tsakonas, David Ish-Horowicz, Ruth Steward, Renato Paro, Ernst Hafen, Mike Levine, Bill McGinnis, Atsushi Kuroiwa, Yash Hiromi, Marek Mlodzik, Cahir O’Kane, Henry Krause, Greg Gibson, Leslie Pick, Ylva Engstroem, Tony Percival-Smith, Shigeru Kondo, Ueli Grossniklaus, Markus Affolter, Hugo Bellen, Clive Wilson, Ken Cadigan, Georg Halder and Patrick Callaerts, to name just a few.

Gehring was not only a visionary scientist and mentor but he was broadly engaged in research enterprise and education. He was an inspiring teacher of genetics, evolution, marine biology and developmental biology and co-author of the leading German textbook in zoology. He was a pioneer in training molecular biologists in Europe during the early days of the cloning revolution, and was a generous supporter of EMBO, serving as Secretary General (1996-2001) and helping lay the foundation for the ascendance of Europe in the field of molecular biology. Gehring and his colleagues, including Werner Arber, Gottfried Schatz, Max Burger and Eduard Kellenberger, made the Biozentrum one of the most exciting institutes in the world for modern biology. Together with his outstanding assistant Erika Wenger, he organized many inspiring conferences in remarkable settings, and during the

anti-immigration movement in Switzerland in the 1970s, he and his colleagues stood up for foreign scientists.

There was a special playfulness to Gehring. When he found the *Antennapedia* allele, he named it *Nasobemia*, inspired by Christian Morgenstern’s poem ‘Das Nasobem’, which describes a hopeful monster walking on its nose. And when he led his marine biology students through Banyuls-sur-Mer, a beautiful village in the south of France, he would profess about the secrets of wine and how to pick and peel figs and eat coquille St. Jacques. He would travel to remote places to observe and photograph his beloved birds and, more recently, butterflies. Gehring’s passion and knowledge spanned entire fields, from DNA-protein interactions to bird migration, and from French wine to eye evolution. We will miss one of the last renaissance men in biology.

#### References

- Akam, M. E. (1983). The location of Ultrabithorax transcripts in *Drosophila* tissue sections. *EMBO J.* **2**, 2075-2084.
- Artavanis-Tsakonas, S., Schedl, P., Tschudi, C., Pirrotta, V., Steward, R. and Gehring, W. J. (1977). The 5S genes of *Drosophila melanogaster*. *Cell* **12**, 1057-1067.
- Bellen, H. J., O’Kane, C. J., Wilson, C., Grossniklaus, U., Pearson, R. K. and Gehring, W. J. (1989). P-element-mediated enhancer detection: a versatile method to study development in *Drosophila*. *Genes Dev.* **3**, 1288-1300.
- Bender, W., Akam, M., Karch, F., Beachy, P. A., Peifer, M., Spierer, P., Lewis, E. B. and Hogness, D. S. (1983). Molecular genetics of the bithorax complex in *Drosophila melanogaster*. *Science* **221**, 23-29.
- Chan, L.-N. and Gehring, W. (1971). Determination of blastoderm cells in *Drosophila melanogaster*. *Proc. Natl. Acad. Sci. USA* **68**, 2217-2221.
- Darwin, C. R. (1859). *On the Origin of Species by Means of Natural Selection, or the Preservation of Favoured Races in the Struggle for Life*. London: John Murray.
- Fjose, A., McGinnis, W. J. and Gehring, W. J. (1985). Isolation of a homeo box-containing gene from the engrailed region of *Drosophila* and the spatial distribution of its transcripts. *Nature* **313**, 284-289.
- Garber, R. L., Kuroiwa, A. and Gehring, W. J. (1983). Genomic and cDNA clones of the homeotic locus *Antennapedia* in *Drosophila*. *EMBO J.* **2**, 2027-2036.
- Gehring, W. (1966a). Bildung eines vollständigen Mittelbeins mit Sternopleura in der Antennenregion bei der Mutante *Nasobemia* (Ns) von *Drosophila melanogaster*. *Arch. Klaus. Stift. Vererb. Forsch.* **41**, 44-54.
- Gehring, W. (1966b). Uebertragung und Aenderung der Determinationsqualitaeten in den Antennenscheiben-Kulturen von *Drosophila melanogaster*. *J. Embryol. Exp. Morphol.* **15**, 77-111.
- Gehring, W. J. (1998). *Master Control Genes in Development and Evolution: The Homeobox Story*. New Haven: Yale University Press.
- Gehring, W. J. (1999). Lifting the lid on the homeobox discovery. *Nature* **399**, 521-522.
- Gehring, W. J. (2014). The evolution of vision. *Wiley Interdiscip. Rev. Dev. Biol.* **3**, 1-40.
- Gehring, W. J. and Ikeo, K. (1999). Pax 6: mastering eye morphogenesis and eye evolution. *Trends Genet.* **15**, 371-377.
- Glover, D. M., White, R. L., Finnegan, D. J. and Hogness, D. S. (1975). Characterization of six cloned DNAs from *Drosophila melanogaster*, including one that contains the genes for rRNA. *Cell* **5**, 149-157.
- Hafen, E., Levine, M., Garber, R. L. and Gehring, W. J. (1983). An improved in situ hybridization method for the detection of cellular RNAs in *Drosophila* tissue sections and its application for localizing transcripts of the homeotic *Antennapedia* gene complex. *EMBO J.* **2**, 617-623.
- Hafen, E., Kuroiwa, A. and Gehring, W. J. (1984). Spatial distribution of transcripts from the segmentation gene *fushi tarazu* during *Drosophila* embryonic development. *Cell* **37**, 833-841.
- Halder, G., Callaerts, P. and Gehring, W. J. (1995). Induction of ectopic eyes by targeted expression of the eyeless gene in *Drosophila*. *Science* **267**, 1788-1792.
- Hiromi, Y. and Gehring, W. J. (1987). Regulation and function of the *Drosophila* segmentation gene *fushi tarazu*. *Cell* **50**, 963-974.
- Hiromi, Y., Kuroiwa, A. and Gehring, W. J. (1985). Control elements of the *Drosophila* segmentation gene *fushi tarazu*. *Cell* **43**, 603-613.
- Kuroiwa, A., Hafen, E. and Gehring, W. J. (1984). Cloning and transcriptional analysis of the segmentation gene *fushi tarazu* of *Drosophila*. *Cell* **37**, 825-831.
- Levine, M., Hafen, E., Garber, R. L. and Gehring, W. J. (1983). Spatial distribution of *Antennapedia* transcripts during *Drosophila* development. *EMBO J.* **2**, 2037-2046.

- McGinnis, W. and Lawrence, P. A.** (1999). Historical transformations. *Nature* **398**, 301-302.
- McGinnis, W., Levine, M. S., Hafen, E., Kuroiwa, A. and Gehring, W. J.** (1984a). A conserved DNA sequence in homeotic genes of the *Drosophila* Antennapedia and bithorax complexes. *Nature* **308**, 428-433.
- McGinnis, W., Garber, R. L., Wirz, J., Kuroiwa, A. and Gehring, W. J.** (1984b). A homologous protein-coding sequence in *Drosophila* homeotic genes and its conservation in other metazoans. *Cell* **37**, 403-408.
- McGinnis, W., Hart, C. P., Gehring, W. J. and Ruddle, F. H.** (1984c). Molecular cloning and chromosome mapping of a mouse DNA sequence homologous to homeotic genes of *Drosophila*. *Cell* **38**, 675-680.
- Mlodzik, M., Fjose, A. and Gehring, W. J.** (1985). Isolation of caudal, a *Drosophila* homeo box-containing gene with maternal expression, whose transcripts form a concentration gradient at the pre-blastoderm stage. *EMBO J.* **4**, 2961-2969.
- O'Kane, C. J. and Gehring, W. J.** (1987). Detection in situ of genomic regulatory elements in *Drosophila*. *Proc. Natl. Acad. Sci. USA* **84**, 9123-9127.
- Prince, F., Katsuyama, T., Oshima, Y., Plaza, S., Resendez-Perez, D., Berry, M., Kurata, S. and Gehring, W. J.** (2008). The YPWM motif links Antennapedia to the basal transcriptional machinery. *Development* **135**, 1669-1679.
- Qian, Y. Q., Billeter, M., Otting, G., Müller, M., Gehring, W. J. and Wüthrich, K.** (1989). The structure of the Antennapedia homeodomain determined by NMR spectroscopy in solution: comparison with prokaryotic repressors. *Cell* **59**, 573-580.
- Quiring, R., Walldorf, U., Kloter, U. and Gehring, W. J.** (1994). Homology of the eyeless gene of *Drosophila* to the Small eye gene in mice and Aniridia in humans. *Science* **265**, 785-789.
- Schier, A. F. and Gehring, W. J.** (1992). Direct homeodomain-DNA interaction in the autoregulation of the fushi tarazu gene. *Nature* **356**, 804-807.
- Schneuwly, S., Klemenz, R. and Gehring, W. J.** (1987). Redesigning the body plan of *Drosophila* by ectopic expression of the homeotic gene Antennapedia. *Nature* **325**, 816-818.
- Scott, M. P. and Weiner, A. J.** (1984). Structural relationships among genes that control development: sequence homology between the Antennapedia, Ultrabithorax, and fushi tarazu loci of *Drosophila*. *Proc. Natl. Acad. Sci. USA* **81**, 4115-4119.
- Scott, M. P., Weiner, A. J., Hazelrigg, T. I., Polisky, B. A., Pirrotta, V., Scalenghe, F. and Kaufman, T. C.** (1983). The molecular organization of the Antennapedia locus of *Drosophila*. *Cell* **35**, 763-776.
- Shearn, A., Rice, T., Garen, A. and Gehring, W.** (1971). Imaginal disc abnormalities in lethal mutants of *Drosophila*. *Proc. Natl. Acad. Sci. USA* **68**, 2594-2598.
- Slack, J.** (1984). Developmental biology: a Rosetta stone for pattern formation in animals? *Nature* **310**, 364-365.
- Wilson, C., Pearson, R. K., Bellen, H. J., O'Kane, C. J., Grossniklaus, U. and Gehring, W. J.** (1989). P-element-mediated enhancer detection: an efficient method for isolating and characterizing developmentally regulated genes in *Drosophila*. *Genes Dev.* **3**, 1301-1313.
